# Supplementary material for: Genetic Characteristics and Formation Mechanisms of Distinctive Traits in Two Types of Sinningia speciosa Corolla Tubes Based on Complete Diallel Cross and Multi-Generation Selfing
Source: Research Square preprint supplement (doi:10.21203/rs.3.rs-8675199/v1), 2026-01-29
Supplement: Supplementary file 1 [file 505a8151be2313fa1909cadf.xlsx]

## Sheet: Sheet1
place of introduction			T&N	Main Colour	AVPD	Labiate corolla		CCP
Code		CO\ST	S\D	RHS Card	unit（mm）	Av&DV	IOWCT	Petal Color
A北美洲	1	NA\USA	S10, D25	WH、PI、RE、PU，B，BL	12.11±1.14	SCIN	DI，With Ridge	White+ PM
	2	NA\CAN	S16, D25	WH、PI、RE、PU，B，BL	12,45±1.52	SCIN	DI，With Ridge	White+ PM
B南美洲	3	SA\BRA	S35, D10	WH、PI、RE、PU，BL	9.56±0.68	DIAV	SC，With Ridge	PM+ CPE
	4	SA\CO	S33, D17	WH、PI、RE、PU，BL	9.02±1.03	DIAV	SC，With Ridge	PM+ CPE
C大洋洲	5	OA\AUS	S14, D24	WH、PI、RE、PU，BL	7,86±0.84	CC	DI，SRWPP	PM+ST
	6	OA\NZ	S10, D30	RE、PI、PU、BL	7,42±0.77	CC	DI，SRWPP	PM+ST+RR
D非洲	7	AF\KE	S5, D35	WH、PI、RE、PU，BL	4,32±0.14	DIAV	SC，No Ridge	White+PM
	8	AF\ET	S15, D25	WH、PI、RE、PU，BL	4,26±0.37	DIAV	SC，No Ridge	White+PM+RR
E欧洲	9	EU\NLD	S16, D26	WH、PI、RE、PU，BL,B,GE	6.78±0.97	CC	SC，SRWPP	PM+MO
	10	EU\RUS	S9, D25	WH、PI、RE、PU，BL,B,GE	6.52±0.68	CC	SC，SRWPP	PM+MO
F亚洲	11	AS\JPN	S28, D14	WH、PI、RE、PU，BL	0	SCIN	SC，SRWPP	PC
	12	AS\CHN	S9, D34	WH、PI、RE、PU，BL	0	SCIN	SC，SRWPP	PC +SM
SU		12	500	7main colours	P＜0.05	P＜0.05		RS

## Sheet: Sheet2
	PN			T&N	Main Colour	AVPD	Labiate corolla		CCP
	Code		CO\ST	S\D	RHS Card	unit（mm）	Av&DV	IOWCT	Petal Color
	A	1	NA\USA	S10, D25	WH、PI、RE、PU，B，BL	12.11±1.14	SCIN	DI，With Ridge	White+ PM
		2	NA\CAN	S16, D25	WH、PI、RE、PU，B，BL	12.45±1.52	SCIN	DI，With Ridge	White+ PM
	B	3	SA\BRA	S10, D25	WH、PI、RE、PU，B，BL	12.11±1.14	SCIN	DI，With Ridge	White+ PM
		4	SA\CO	S16, D25	WH、PI、RE、PU，B，BL	12.45±1.52	SCIN	DI，With Ridge	White+ PM					NA\USA	S10, D25	WH、PI、RE、PU，B，BL	12.11±1.14	SCIN	DI，With Ridge	White+ PM
	C	5	OA\AUS	S14, D24	WH、PI、RE、PU，BL	7,86±0.84	CC	DI，SRWPP	PM+ST					NA\CAN	S16, D25	WH、PI、RE、PU，B，BL	12.45±1.52	SCIN	DI，With Ridge	White+ PM
		6	OA\NZ	S10, D30	RE、PI、PU、BL	7,42±0.77	CC	DI，SRWPP	PM+ST+RR
	D	7	AF\KE	S5, D35	WH、PI、RE、PU，BL	4.32±0.14	DIAV	SC，No Ridge	White+PM
		8	AF\ET	S15, D25	WH、PI、RE、PU，BL	4.26±0.37	DIAV	SC，No Ridge	White+PM+RR
	E	9	EU\NLD	S16, D26	WH、PI、RE、PU，BL,B,GE	6.78±0.97	CC	SC，SRWPP	PM+MO
		10	EU\RUS	S9, D25	WH、PI、RE、PU，BL,B,GE	6.52±0.68	CC	SC，SRWPP	PM+MO
	F	11	AS\JPN	S28, D14	WH、PI、RE、PU，BL	0	SCIN	SC，SRWPP	PC
		12	AS\CHN	S9, D34	WH、PI、RE、PU，BL	0	SCIN	SC，SRWPP	PC +SM
	SU		12	500	7main colours	P＜0.05	P＜0.05		RS

## Sheet: 图例特征分析1
			C\S	T&N	Main Colour	AV PD	Labiate corolla		CCP
		C	Origin	S\D	RHS Card	unit（mm）	Av&DV	IOWCT	Color
		1	NA\USA	S10，D25	WH、PI、RE、PU，B，BL	12.11	SCIN 同色不一致	DI，With Ridge	大麻点
			NA\CAN	S16，D25	WH、PI、RE、PU，B，BL	12,45	SCIN	DI，With Ridge 异色+有棱角	大麻点
		2	SA\BRA	S35，D10	WH、PI、RE、PU，BL	9.56	DIAV 腹瓣异色	SC，With Ridge 同色+有棱角	麻点+曲线花边
			SA\CO	S33，D17	WH、PI、RE、PU，BL	9.02	DIAV	SC，With Ridge	麻点+曲线花边
		3	OA\AUS	S14，D24	WH、PI、RE、PU，BL	7,86	CC 同色一致	DI，SRWPP异色+小棱角有脉纹	麻点+条纹
			OA\NZ	S10，D30	RE、PI、PU、BL	7,42	CC	DI，SRWPP	麻点+条纹+彩虹
		4	AF\KE	S5，D35	WH、PI、RE、PU，BL	4,32	DIAV	SC，No Ridge	小麻点
			AF\ET	S15，D25	WH、PI、RE、PU，BL	4,26	DIAV	SC，No Ridge	小麻点+彩虹
		5	EU\NLD	S16，D26	WH、PI、RE、PU，BL,B,GE	6.78	CC	SC，SRWPP同色+小棱角有脉纹	麻点+斑驳
			EU\RUS	S9，D25	WH、PI、RE、PU，BL,B,GE	6.52	CC	SC，SRWPP	麻点+斑驳
		6	AS\JPN	S28，D14	WH、PI、RE、PU，BL	0	SCIN	SC，SRWPP	纯色+艳丽
			AS\CHN	S9，D34	WH、PI、RE、PU，BL	0	SCIN	SC，SRWPP	纯色+沾染
		S	12	500	7main colours
		CC,Campanulate corolla；PD,pockmark diameter；LC,Labiate corolla；CCP,Characteristics of the corolla pattern
		T&N，Type&Number;C,Code；S,Summarize;C, Continent;S,state; SCIN,Same color inconsistency;
		CC,Consistent color;AV,Abdominal valve ;DV, Dorsal valve;DI,Discoloration;SC,same color;
		,WR，With Ridge；NR,No Ridge；IOWCT,Inner and outer walls of corolla tube;SRWPP,small Ridge with Pulse pattern

## Sheet: 图例特征分析2
	表2 不同地域花冠色系分布特征分析
		世界分布	材料来源地（国家）	RHS内容表现分区	花喉性状	花冠特征
	1	北美州	美国	RED-PURPLE GROUP 40、41、42、43、44、N45、46、47、50、51、54、55、56、N57 、63、62、65、66、69，75、76、77、79、NN78	麻喉，白喉	麻点较大，花色由麻点颜色和麻点分布相关
	2	南美州	巴西		麻喉	侧筒较多、麻点较多
	3	南美洲	哥伦比亚		麻喉	侧筒\直筒，麻点较多
	4	大洋洲	澳洲+新西兰		麻喉+条纹	麻点衬托在暖色的花冠中
	5	欧洲	乌克兰		麻喉+条纹	麻点互相黏连，与条纹形成特色
	6	欧洲西部	德国		麻喉，白喉	麻点细密，底色与麻点互相衬托
	7	欧洲西部	荷兰		麻喉，白喉	花冠有斑驳特征，暖色系较多
	8	欧亚大陆	俄罗斯		麻喉+条纹	花冠较大，麻点和条纹均有排列
	9	亚洲	日本		大花喉	单瓣花冠较大，渐变色较多
	10	亚洲东部	港台地区		麻喉	暖色麻点和暖色花冠
	11	亚洲东部	中国大陆		白喉，麻喉	花冠纯色，较多艳丽清爽

## Sheet: 花冠特征1
		花冠直径(cm)		花喉直径(cm)		单瓣花瓣裂片数量		花冠筒长度（cm）
		唇型	钟型	唇型	钟型	唇型	钟型	唇型	钟型
	NA\USA	7.3±0.88	8.51±0.18	2.6±1.20	3.01±1.24	5.6±1.88	7.81±1.07*	6.12±1.05	5.5±1.55
	NA\CAN	6.84±1.22	7.02±1.18	2.89±0.88	3.00±0.96	5.4±0.24	8.01±0.18*	6.6±1.25	4.5±0.03
	SA\BRA	6.78±1.54	7.11±0.87	2.88±1.13	3.02±1.05	6.02±0.54	7.22±0.56	7.22±0.87*	5±2.13
	SA\CO	7.12±0.88	7.5±0.56	2.58±1.14	2.62±1.56	5.41±0.68	6.12±0.14	5.54±0.56	4.5±0.36
	OA\AUS	6.56±1.13	7.06±0.12	2.66±0.15	2.72±0.25	5.24±0.13	6.22±0.56	6.42±1.67	4.5±1.09
	OA\NZ	7.48±1.14	8.5±0.13	2.66±1.18	3.56±1.14	5.62±1.26	7.34±0.02	6.74±0.22	5.5±0.55
	AF\KE	6.88±1.15	7.04±1.14	2.52±1.17	2.58±0.56	5.44±0.78	6.56±1.18	6.52±0.12	4.5±2.12
	AF\ET	7.24±1.16	8.5±0.15	2.56±1.15	3.09±0.89	5.24±0.56	7.12±0.66	7.04±1.24	5±1.58
	EU\NLD	7.64±1.17	8.5±1.02	2.46±1.16	2.74±1.22	5.62±1.56	7.04±0.09	7.05±0.96	4.5±1.48
	EU\RUS	6.88±1.18	9.6±0.98*	2.56±0.88	2.88±1.11	5.24±1.11	7.06±0.11	6.68±0.56	4.5±1.73
	AS\JPN	7.88±1.19*	9.5±0.56*	3.32±1.54*	3.81±0.88*	6.28±1.56*	7.03±0.59	6.72±0.18	6±2.01*
	AS\CHN	7.02±1.20	8.5±1.13	2.78±1.22	3.65±1.16	6.01±0.54	7.11±0.12	7.04±0.65	6±1.48*
	平均	7.17±1.08	8.1±0.88*	2.71±1.19	2.97±0.98	5.57±1.54	6.85±1.11*	6.66±0.98*	4.68±1.08
	Variety origin	CD(cm)		FTD (cm)		NP（S）		CTL（cm）
		L	C	L	C	L	C	L	C
	NA\USA	7.3±0.88	8.51±0.18	2.6±1.20	3.01±1.24	5.01±1.88	5.81±1.07*	6.12±1.05	5.5±1.55
	NA\CAN	6.84±1.22	7.02±1.18	2.89±0.88	3.00±0.96	5.04±0.24	5.01±0.18*	6.6±1.25	4.5±0.03
	SA\BRA	6.78±1.54	7.11±0.87	2.88±1.13	3.02±1.05	5.02±0.54	5.22±0.56	7.22±0.87*	5±2.13
	SA\CO	7.12±0.88	7.5±0.56	2.58±1.14	2.62±1.56	5.61±0.68	5.82±0.14	5.54±0.56	4.5±0.36
	OA\AUS	6.56±1.13	7.06±0.12	2.66±0.15	2.72±0.25	6.24±0.13	6.32±0.56	6.42±1.67	4.5±1.09
	OA\NZ	7.48±1.14	8.5±0.13	2.66±1.18	3.56±1.14	6.12±1.26	6.14±0.02	6.74±0.22	5.5±0.55
	AF\KE	6.88±1.15	7.04±1.14	2.52±1.17	2.58±0.56	5.44±0.78	7.56±1.18	6.52±0.12	4.5±2.12
	AF\ET	7.24±1.16	8.5±0.15	2.56±1.15	3.09±0.89	5.24±0.56	7.12±0.66	7.04±1.24	5±1.58
	EU\NLD	7.64±1.17	8.5±1.02	2.46±1.16	2.74±1.22	5.62±1.56	8.04±0.09	7.05±0.96	4.5±1.48
	EU\RUS	6.88±1.18	9.6±0.98*	2.56±0.88	2.88±1.11	6.14±1.11	8.06±0.11	6.68±0.56	4.5±1.73
	AS\JPN	7.88±1.19*	9.5±0.56*	3.32±1.54*	3.81±0.88*	6.28±1.56*	8.43±0.59	6.72±0.18	6±2.01*
	AS\CHN	7.02±1.20	8.5±1.13	2.78±1.22	3.65±1.16	5.74±0.54	7.66±0.12	7.04±0.65	6±1.48*
	AVV	7.17±1.08	8.1±0.88*	2.71±1.19	2.97±0.98	5.57±1.54	6.85±1.11*	6.66±0.98*	4.68±1.08

## Sheet: 关键特征1-3
	自交代数	F1		F3		自交代数	F1		F3		自交代数	F1		F3		自交代数	F1		F3
	Variety origin	CD(cm)	CD(cm)	CD(cm)	CD(cm)	Variety origin	FTD (cm)	FTD (cm)	FTD (cm)	FTD (cm)	Variety origin	NSPL（S）		NSPL（S）		Variety origin	CTL（cm）	CTL（cm）	CTL（cm）	CTL（cm）
		L	C	L	C		L	C	L	C		L	C	L	C		L	C	L	C
	NA\USA	7.42	8.66	7.3	8.51	NA\USA	2.63	3.21	2.58	3.01	NA\USA	5.61	6.32	5.01	5.81	NA\USA	7.11	4.68	6.88	5.01
	NA\CAN	7.21	7.84	7.02	7.52	NA\CAN	2.69	3.89	2.65	3	NA\CAN	5.54	6.26	5.04	5.01	NA\CAN	7.23	4.52	6.91	4.89
	SA\BRA	6.88	7.62	6.78	7.41	SA\BRA	2.88	3.42	2.81	3.02	SA\BRA	5.22	5.98	5.02	5.22	SA\BRA	7.56	4.68	7.32	5
	SA\CO	7.02	8.05	6.84	7.5	SA\CO	2.88	3.02	2.84	2.62	SA\CO	5.61	6.45	5.61	5.82	SA\CO	7.56	5.08	7.29	5.11
	OA\AUS	7.66	8.24	7.56	8.16	OA\AUS	2.66	3.11	2.56	2.72	OA\AUS	6.44	6.98	6.24	6.32	OA\AUS	7.23	4.45	6.68	4.58
	OA\NZ	7.52	8.95	7.48	8.5	OA\NZ	2.66	3.68	2.48	3.56	OA\NZ	6.32	6.66	6.12	6.14	OA\NZ	7.08	4.37	6.74	4.62
	AF\KE	6.94	8.19	6.88	7.54	AF\KE	2.52	2.58	2.44	2.58	AF\KE	5.64	7.81	5.44	7.56	AF\KE	8.05	4.5	7.62	4.5
	AF\ET	7.01	8.89	6.79	8.5	AF\ET	2.56	3.34	2.38	3.09	AF\ET	5.44	8.65	5.24	7.12	AF\ET	8.04	4.67	7.64	5
	EU\NLD	6.74	9.12	6.64	8.68	EU\NLD	2.46	2.96	2.38	2.74	EU\NLD	5.82	10.23	5.62	8.04	EU\NLD	7.56	4.35	6.05	4.5
	EU\RUS	6.66	10.23	6.58	9.65	EU\RUS	2.43	3.21	2.31	2.88	EU\RUS	6.34	9.87	6.14	8.06	EU\RUS	6.34	4.44	5.98	4.5
	AS\JPN	7.14	11.21	7.08	10.36	AS\JPN	2.42	3.22	2.38	2.81	AS\JPN	6.48	11.02	6.28	8.43	AS\JPN	7.11	5.69	6.72	6.5
	AS\CHN	7.11	9.89	7.02	9.35	AS\CHN	2.444	3.98	2.38	3.65	AS\CHN	5.94	9.12	5.74	7.66	AS\CHN	7.08	5.54	6.74	6
	AV	7.17	8.1			AV			2.71±1.19	2.97±0.98	AV				5.57±1.54	AV			6.66±0.98*	4.68±1.08
	花冠直径(cm)		花喉直径(cm)		单瓣花瓣裂片数量		花冠筒长度（cm）

## Sheet: 其他特征
	来源\类型	花期（天）		年单株开花数量（个）		株高（cm）		花梗长度（cm）
		唇型	钟型	唇型	钟型	唇型	钟型	唇型	钟型
	美国	8.8±0.18	7.5±1.24	43.5±1.56	39.5±2.43*	18.88±1.88	20.56±1.05	5.5±1.24	6.11±1.55
	加拿大	6.5±1.18	6±0.88	40.6±8.95	36.6±2.12	16.52±2.18	20.01±3.11	4.1±1.48	5.1±1.11
	巴西	6±0.98	5.2±1.11	42.5±5.25	36.8±3.21	23.02±4.56*	26.02±2.66*	5.2±2.18	6.7±1.73*
	哥伦比亚	6.5±1.19	5.8±0.56	43.6±6.31	38.5±5.12	22.01±1.11	22.56±1.18	5.8±0.11	5.8±1.48
	澳大利亚	6.6±1.18	6.4±0.98	42.8±2.44	36.4±2.23	21.44±1.14	20.75±2.12	5.4±0.56	5.41±1.18
	新西兰	6.6±1.15	5.9±0.56	44.6±4.24	36.6±1.68	20.65±2.78	23.04±0.56*	5.5±0.66	6.02±0.18
	肯尼亚	5.8±1.19	5.2±1.17	48.0±5.65*	36.5±3.69	22.56±0.22	20.58±1.81	4.8±0.54	6.1±0.56
	埃塞俄比亚	6.6±0.56	5.8±1.02	50.1±0.23*	42.5±1.56	20.56±1.20	22.12±3.29	4.7±1.56	6.01±0.78
	荷兰	6.3±0.88	6.2±1.22	47.6±2.32	40.5±2.24*	20.02±1.67	21.22±0.59	6.2±0.68	6.8±0.56*
	俄罗斯	9.1±1.56	6.6±1.56	46.4±0.56	38.8±1.65	22.24±3.08	20.22±2.01	5.1±0.56	5.6±0.12
	日本	9.2±1.73	6.8±0.02	47.6±1.23	34.6±2.14	21.54±3.29	22.25±1.11	6.2±0.36	6.22±1.12
	中国	7.5±1.03	6.2±1.33	46.21±1.56	35.75±3.02	22.24±2.21	21.59±1.41	5.6±1.66	6.02±1.14
	平均	7.23±	6.13±	45.29±	38.59±	20.97±	22.58±	5.34±	6.01±
		1.63*	0.22	3.33*	2.32	2.01	2.22*	0.76	1.13*
	Variety origin	FD（day）		NFPP（NO.）		PH（cm）		PL（cm）
		L	C	L	C	L	C	L	C
	NA\USA	8.8±0.18	7.5±1.24	43.5±1.56	39.5±2.43*	18.88±1.88	20.56±1.05	5.5±1.24	6.11±1.55
	NA\CAN	6.5±1.18	6±0.88	40.6±8.95	36.6±2.12	16.52±2.18	20.01±3.11	4.1±1.48	5.1±1.11
	SA\BRA	6±0.98	5.2±1.11	42.5±5.25	36.8±3.21	23.02±4.56*	26.02±2.66*	5.2±2.18	6.7±1.73*
	SA\CO	6.5±1.19	5.8±0.56	43.6±6.31	38.5±5.12	22.01±1.11	22.56±1.18	5.8±0.11	5.8±1.48
	OA\AUS	6.6±1.18	6.4±0.98	42.8±2.44	36.4±2.23	21.44±1.14	20.75±2.12	5.4±0.56	5.41±1.18
	OA\NZ	6.6±1.15	5.9±0.56	44.6±4.24	36.6±1.68	20.65±2.78	23.04±0.56*	5.5±0.66	6.02±0.18
	AF\KE	5.8±1.19	5.2±1.17	48.0±5.65*	36.5±3.69	22.56±0.22	20.58±1.81	4.8±0.54	6.1±0.56
	AF\ET	6.6±0.56	5.8±1.02	50.1±0.23*	42.5±1.56	20.56±1.20	22.12±3.29	4.7±1.56	6.01±0.78
	EU\NLD	6.3±0.88	6.2±1.22	47.6±2.32	40.5±2.24*	20.02±1.67	21.22±0.59	6.2±0.68	6.8±0.56*
	EU\RUS	9.1±1.56	6.6±1.56	46.4±0.56	38.8±1.65	22.24±3.08	20.22±2.01	5.1±0.56	5.6±0.12
	AS\JPN	9.2±1.73	6.8±0.02	47.6±1.23	34.6±2.14	21.54±3.29	22.25±1.11	6.2±0.36	6.22±1.12
	AS\CHN	7.5±1.03	6.2±1.33	46.21±1.56	35.75±3.02	22.24±2.21	21.59±1.41	5.6±1.66	6.02±1.14
	AV	7.23±1.63*	6.13±0.22	45.29±3.33*	38.59±2.32	20.97±2.01	22.58±2.22*	5.34±0.76	6.01±1.13*

## Sheet: 其他特征1-3
	自交代数	F1		F3		自交代数	F1		F3		自交代数	F1		F3		自交代数	F1		F3
	Variety origin	FD（day）		FD（day）		Variety origin	NFPP（NO.）		NFPP（NO.）		Variety origin	PH（cm）		PH（cm）		Variety origin	PL（cm）		PL（cm）
		L	C	L	C		L	C	L	C		L	C	L	C		L	C	L	C
	NA\USA	9.12	8.1	8.8	7.5	NA\USA	45.32	42.12	43.5	39.5	NA\USA	21.35	23.65	18.88	20.56	NA\USA	6.01	6.89	5.5	6.11
	NA\CAN	7.24	6.52	6.5	6	NA\CAN	42.35	39.12	40.6	36.6	NA\CAN	20.05	24.12	16.52	20.01	NA\CAN	6.01	6.04	4.1	5.1
	SA\BRA	7.32	6.87	6	5.2	SA\BRA	46.89	38.63	42.5	36.8	SA\BRA	25.86	30.01	21.02	26.02	SA\BRA	6.23	7.12	5.2	6.7
	SA\CO	7.56	6.64	6.82	5.8	SA\CO	46.12	41.22	43.6	38.5	SA\CO	24.35	28.36	21.01	25.56	SA\CO	6.18	6.92	5.56	5.8
	OA\AUS	7.89	7.64	6.6	6.4	OA\AUS	45.21	39.14	42.8	36.4	OA\AUS	24.51	25.12	21.44	20.75	OA\AUS	6.01	6.25	5.4	5.41
	OA\NZ	8.18	6.68	6.38	5.9	OA\NZ	48.12	38.66	44.6	36.6	OA\NZ	23.12	28.47	20.65	23.04	OA\NZ	6.38	7.14	5.5	6.02
	AF\KE	7.01	6.52	5.8	5.2	AF\KE	50.12	38.21	48	36.5	AF\KE	22.14	26.12	22.56	20.58	AF\KE	5.44	6.98	4.8	6.1
	AF\ET	7.21	6.89	6.6	5.8	AF\ET	53.12	45.12	50.1	42.5	AF\ET	23.33	25.63	20.56	22.12	AF\ET	5.56	7.12	4.7	6.01
	EU\NLD	6.98	6.87	6.3	6.2	EU\NLD	50.42	41.25	47.6	40.5	EU\NLD	23.15	24.44	20.02	21.22	EU\NLD	7.11	8.12	6.2	6.8
	EU\RUS	9.89	7.21	9.1	6.6	EU\RUS	48.95	41.51	46.4	38.8	EU\RUS	25.33	27.56	22.24	20.22	EU\RUS	6.66	6.88	5.1	5.6
	AS\JPN	10.21	7.65	9.2	6.8	AS\JPN	50.23	37.85	47.6	34.6	AS\JPN	23.14	26.14	21.54	22.25	AS\JPN	7.02	7.44	6.2	6.22
	AS\CHN	8.12	7.24	7.5	6.2	AS\CHN	51.23	39.56	46.21	35.75	AS\CHN	24.89	26.12	22.24	21.59	AS\CHN	6.87	7.21	5.6	6.02
	AV					AV					AV					AV		98
			花期（天）		年单株开花数量（个）		株高（cm）		花梗长度（cm）

## Sheet: 扩增结果唇型
		PN	OD260	ODz80	OD260/OD280	MC/(4gL-1)	ABN	NPB	PBR（%）
		B20	0.186	0.087	2.13793	1.86	6	5	0.833333
		B21	0. 129	0.089	1.449	1.29	7	6	0.857143
		B22	0. 145	0. 078	1.858	1.45	9	6	0.666667
		B23	0.163	0.098	1.66327	1.63	6	5	0.833333
		B24	0.187	0.085	2.2	1.87	6	6	1
		B25	0.145	0.087	1.66667	1.45	8	6	0.75
		B26	0.136	0.114	1.19298	1.36	9	7	0.777778
		B27	0.144	0.088	1.63636	1.44	9	7	0.777778
		B28	0.158	0.098	1.61224	1.58	9	7	0.777778
		B29	0.116	0.068	1.70588	1.16	8	6	0.75
		B30	0.184	0.089	2.06742	1.84	6	4	0.666667
		B31	0. 175	0. 089	1.966	1.75	5	3	0.6
							88	68

## Sheet: 扩增结果钟型
		PN	OD260	ODz80	OD260/OD280	MC/(4gL-1)	ABN	NPB	PBR（%）
		B20	0.171\	0.094\	1.819 \	1.711\	5	4	0.8
		B21	0. 159\	0.089\	1.786\	1.592\	7	6	0.857143
		B22	0. 188\	0. 142\	1.324\	1. 883\	4	3	0.75
		B23	0.142\	0.078\	1.821\	1.425\	3	3	1
		B24	0.153\	0.085\	1.800\	1. 531\	3	3	1
		B25	0.178\	0.141\	1.262\	1.785\	6	5	0.833333
		B26	0.141\	0.087\	1.621\	1.418\	3	3	1
		B27	0.136\	0.075\	1.813\	1.362\	3	3	1
		B28	0.128\	0.086\	1.488\	1.283\	3	3	1
		B29	0.086\	0.039\	2.205\	0.86\	5	4	0.8
		B30	0.158\	0.089\	1.775\	1.583\	3	3	1
		B31	0. 172\	0. 082\	2.097\	1.725\	6	5	0.833333
							51	45

[truncated: 1 more sheets: 遗传距离]
